# Supplementary material for: Association between work time loss and quality of life in patients with Herpes Zoster: a pooled analysis of the MASTER studies
Source: Springer Nature journal article supplement (doi:10.1186/s12955-017-0588-x), 2017-01-01
Supplement: MOESM1 [file 12005634]

**WORK AND PRODUCTIVITY QUESTIONNAIRE**

These questions are about your work for pay during your shingles episode. Please read and answer each question carefully. If you are not sure how to answer a question, please give the best answer you can.

1. Before your shingles episode, did you work at a paying job?

No > If NO, then skip this questionnaire and go to the Health Care Utilization Resource Use on

Yes > If YES, then please continue

2. Number of times you missed work because of the effects of your shingles, shingles medication, or other treatment for shingles? (If none, please write "0")

|                                                                                                                                                                         |                                                                                                                                                                         |
|-------------------------------------------------------------------------------------------------------------------------------------------------------------------------|-------------------------------------------------------------------------------------------------------------------------------------------------------------------------|
| <b>an entire day</b>                                                                                                                                                    | <b>part of a work day</b>                                                                                                                                               |
| <input style="width: 30px; height: 20px; border: 1px solid black;" type="text"/> <input style="width: 30px; height: 20px; border: 1px solid black;" type="text"/> Times | <input style="width: 30px; height: 20px; border: 1px solid black;" type="text"/> <input style="width: 30px; height: 20px; border: 1px solid black;" type="text"/> Times |

3. Please indicate the principle causes of your absences: (please check all that apply)

- |                                                    |                                                                           |
|----------------------------------------------------|---------------------------------------------------------------------------|
| <input type="checkbox"/> healthcare visits         | <input type="checkbox"/> unable to concentrate at work                    |
| <input type="checkbox"/> too much pain to work     | <input type="checkbox"/> visible rash kept you from wanting to go to work |
| <input type="checkbox"/> too uncomfortable to work | <input type="checkbox"/> side effects of shingles medication              |
| <input type="checkbox"/> other (specify): _____    |                                                                           |

4. Please indicate whether you needed to:

a. Take extended sick leave due to your shingles episode?

No

Yes > If YES, for how long? 

 days

b. Go on disability due to your shingles episode?

No

Yes > If YES, for how long? 

 days

c. Used vacation time to recover from your shingles episode?

No

Yes > If YES, for how long? 

 days

5. How would you rate your effectiveness at work during your shingles episode? (check only one box)  N/A (no pain)

|                         |     |     |     |     |     |     |     |     |                                                                      |      |
|-------------------------|-----|-----|-----|-----|-----|-----|-----|-----|----------------------------------------------------------------------|------|
| 0%                      | 10% | 20% | 30% | 40% | 50% | 60% | 70% | 80% | 90%                                                                  | 100% |
| Not effective<br>at all |     |     |     |     |     |     |     |     | Completely effective<br>(able to work like before<br>shingles began) |      |
